# Supplementary material for: Genes associate with Immunity and Amino Acid Metabolism in Lung adenocarcinoma (LUAD): A bioinformatic analysis
Source: Research Square preprint supplement (doi:10.21203/rs.3.rs-3344958/v1), 2023-09-28
Supplement: Supplementary file 1 [file 07b9bb2c53fdd7a2043f9dca.xlsx]

## Sheet: Sheet1
Gene symbol
PLK1	KIF11	KIF23	UBE2C
CDK1	MAD2L1	RRM2	CDC25C
CCNA2	CCNB2	CDT1	CENPF
AURKA	BIRC5	CDC20	TRIP13
HMMR
