# Supplementary material for: Genes associate with Immunity and Amino Acid Metabolism in Lung adenocarcinoma (LUAD): A bioinformatic analysis
Source: Research Square preprint supplement (doi:10.21203/rs.3.rs-3344958/v1), 2023-09-28
Supplement: Supplementary file 2 [file 247bfa3eb9bdaa102f4583ff.xlsx]

## Sheet: Sheet1
Rank	Name	Score
1	CDK1	779000000000000
2	PLK1	779000000000000
3	CCNA2	779000000000000
4	CCNB2	779000000000000
5	AURKA	779000000000000
6	CDC20	779000000000000
7	BIRC5	779000000000000
8	CDT1	779000000000000
9	RRM2	779000000000000
10	KIF11	779000000000000
11	UBE2C	779000000000000
12	KIF23	775000000000000
13	CDC25C	758000000000000
14	MAD2L1	757000000000000
15	CENPF	756000000000000
16	HMMR	753000000000000
17	TRIP13	403000000000000
18	E2F8	377000000000000
18	E2F7	377000000000000
20	ANLN	356000000000000
21	CCNE1	23500000000000
22	TROAP	22200000000000
23	CDCA7	20900000000000
24	PKMYT1	3920000000000
25	CDKN2A	479000000
26	BLM	79800000
27	E2F2	40300000
28	ALB	9380
29	IL6	8518
30	F2	6822
