# Supplementary material for: Genes associate with Immunity and Amino Acid Metabolism in Lung adenocarcinoma (LUAD): A bioinformatic analysis
Source: Research Square preprint supplement (doi:10.21203/rs.3.rs-3344958/v1), 2023-09-28
Supplement: Supplementary file 3 [file 4bc73799edb661dd2f7ebd9d.xlsx]

## Sheet: Sheet1
Rank	Name	Score
1	ALB	79
2	IL6	58
3	GCG	32
4	CDK1	31
5	KIF11	30
5	CCNA2	30
5	PLK1	30
5	GFAP	30
9	AURKA	29
10	CDC20	27
11	CDT1	26
11	MAD2L1	26
11	CCNB2	26
11	RRM2	26
11	SST	26
11	KIF23	26
17	CDC25C	25
17	BIRC5	25
17	CENPF	25
17	F2	25
21	UBE2C	24
21	CDKN2A	24
23	HMMR	22
23	GRIN1	22
23	AFP	22
23	TRIP13	22
27	PKMYT1	21
27	CCNE1	21
27	GAD1	21
27	SLC2A2	21
