# Supplementary material for: Genes associate with Immunity and Amino Acid Metabolism in Lung adenocarcinoma (LUAD): A bioinformatic analysis
Source: Research Square preprint supplement (doi:10.21203/rs.3.rs-3344958/v1), 2023-09-28
Supplement: Supplementary file 4 [file 50b7682fa95b145010f2c6eb.xlsx]

## Sheet: Sheet1
Rank	Name	Score
1	ALB	77.299
2	IL6	73.712
3	PLK1	71.454
4	CDK1	71.017
5	CCNA2	70.578
6	AURKA	70.207
7	KIF23	69.783
8	RRM2	69.769
9	CDT1	69.614
10	CDC20	69.54
11	KIF11	69.144
12	MAD2L1	68.91
13	CCNB2	68.766
14	BIRC5	68.654
15	UBE2C	68.302
16	CDC25C	68.005
17	CENPF	67.183
18	E2F8	66.541
19	TRIP13	66.329
20	CCNE1	66.034
21	HMMR	66.003
22	CDKN2A	65.785
23	PKMYT1	65.402
24	GCG	65.314
25	GFAP	64.042
26	E2F7	63.792
27	AFP	63.556
28	SST	62.714
29	TROAP	62.462
30	ANLN	61.691
