# Supplementary material for: Genes associate with Immunity and Amino Acid Metabolism in Lung adenocarcinoma (LUAD): A bioinformatic analysis
Source: Research Square preprint supplement (doi:10.21203/rs.3.rs-3344958/v1), 2023-09-28
Supplement: Supplementary file 5 [file 556cee1539c21dbe10047d7a.xlsx]

## Sheet: Sheet1
Characteristics	Total(N)	Univariate analysis			Multivariate analysis
		HR(95% CI)		P value	HR(95% CI)	P value
PLK1	530		< 0.001
Low	267	Reference			Reference
High	263	1.831 (1.366 - 2.454)	< 0.001		1.575 (1.019 - 2.436)	0.041
RRM2	530		0.002
Low	266	Reference			Reference
High	264	1.587 (1.184 - 2.127)	0.002		0.965 (0.590 - 1.580)	0.888
TRIP13	530		0.003
Low	266	Reference			Reference
High	264	1.546 (1.156 - 2.069)	0.003		1.054 (0.690 - 1.609)	0.807
HMMR	530		< 0.001
Low	267	Reference			Reference
High	263	1.678 (1.252 - 2.250)	< 0.001		1.243 (0.807 - 1.916)	0.323
