# Supplementary material for: Genes associate with Immunity and Amino Acid Metabolism in Lung adenocarcinoma (LUAD): A bioinformatic analysis
Source: Research Square preprint supplement (doi:10.21203/rs.3.rs-3344958/v1), 2023-09-28
Supplement: Supplementary file 6 [file 57a2f634790eda611c0b6c8d.xlsx]

## Sheet: Sheet1
Ontology	ID	Description	GeneRatio	BgRatio	pvalue	p.adjust
BP	GO:0044772	mitotic cell cycle phase transition	12/16	440/18800	3.89e-17	7.9e-15
BP	GO:0140014	mitotic nuclear division	11/16	293/18800	4.45e-17	7.9e-15
BP	GO:0000280	nuclear division	12/16	446/18800	4.59e-17	7.9e-15
BP	GO:0048285	organelle fission	12/16	493/18800	1.53e-16	1.98e-14
BP	GO:1901990	regulation of mitotic cell cycle phase transition	10/16	321/18800	1.34e-14	1.39e-12
CC	GO:0005819	spindle	10/17	402/19594	2.02e-13	1.11e-11
CC	GO:0072686	mitotic spindle	6/17	160/19594	3.1e-09	7.9e-08
CC	GO:0000922	spindle pole	6/17	169/19594	4.31e-09	7.9e-08
CC	GO:0005876	spindle microtubule	5/17	83/19594	7.18e-09	9.87e-08
CC	GO:0030496	midbody	6/17	203/19594	1.29e-08	1.42e-07
MF	GO:0008017	microtubule binding	5/17	272/18410	3.63e-06	0.0002
MF	GO:0015631	tubulin binding	5/17	376/18410	1.75e-05	0.0005
MF	GO:0035173	histone kinase activity	2/17	16/18410	9.56e-05	0.0019
MF	GO:0008022	protein C-terminus binding	3/17	179/18410	0.0006	0.0082
MF	GO:0016538	cyclin-dependent protein serine/threonine kinase regulator activity	2/17	50/18410	0.001	0.0113
KEGG	hsa04914	Progesterone-mediated oocyte maturation	7/13	102/8164	6.23e-11	1.87e-09
KEGG	hsa04110	Cell cycle	7/13	126/8164	2.8e-10	3.69e-09
KEGG	hsa04114	Oocyte meiosis	7/13	131/8164	3.69e-10	3.69e-09
KEGG	hsa04115	p53 signaling pathway	3/13	73/8164	0.0002	0.0014
KEGG	hsa05166	Human T-cell leukemia virus 1 infection	4/13	222/8164	0.0003	0.0019
