# Supplementary material for: Genes associate with Immunity and Amino Acid Metabolism in Lung adenocarcinoma (LUAD): A bioinformatic analysis
Source: Research Square preprint supplement (doi:10.21203/rs.3.rs-3344958/v1), 2023-09-28
Supplement: Supplementary file 7 [file 5bb5df9e41df08f6b8bf0544.docx]

Dear Editor:

The datasets used and/or analysed during the current study available from the corresponding author on reasonable request.

Sincerely,

Yuxin Zhang, Quanwang Li
