# Supplementary material for: Genes associate with Immunity and Amino Acid Metabolism in Lung adenocarcinoma (LUAD): A bioinformatic analysis
Source: Research Square preprint supplement (doi:10.21203/rs.3.rs-3344958/v1), 2023-09-28
Supplement: Supplementary file 8 [file 61e19ad2b23220b42d89b91e.xlsx]

## Sheet: Sheet1
Rank	Name	Score
1	ALB	79
2	IL6	62
3	GCG	33
4	CDK1	32
5	PLK1	31
5	GFAP	31
7	KIF11	30
7	RRM2	30
7	CCNA2	30
7	AURKA	30
11	CDC20	28
11	KIF23	28
13	CDKN2A	27
14	CDT1	26
14	UBE2C	26
14	MAD2L1	26
14	CCNB2	26
14	SST	26
19	CDC25C	25
19	BIRC5	25
19	CENPF	25
19	GRIN1	25
19	F2	25
24	CAV1	24
25	BDNF	23
26	HMMR	22
26	GAD1	22
26	SLC2A2	22
26	AFP	22
26	TRIP13	22
