# Supplementary material for: Genes associate with Immunity and Amino Acid Metabolism in Lung adenocarcinoma (LUAD): A bioinformatic analysis
Source: Research Square preprint supplement (doi:10.21203/rs.3.rs-3344958/v1), 2023-09-28
Supplement: Supplementary file 9 [file 7c0fa019e10f575c7647b125.xlsx]

## Sheet: Sheet1
ID	setSize	NES	pvalue	p.adjust	qvalue
REACTOME_CELL_CYCLE_CHECKPOINTS	237	3.0438	1e-10	7.58e-09	6.02e-09
REACTOME_MITOTIC_G1_PHASE_AND_G1_S_TRANSITION	142	3.0021	1e-10	7.58e-09	6.02e-09
REACTOME_DNA_REPLICATION	137	2.95609	1e-10	7.58e-09	6.02e-09
REACTOME_CELL_CYCLE_MITOTIC	458	2.94715	1e-10	7.58e-09	6.02e-09
REACTOME_G2_M_CHECKPOINTS	134	2.90127	1e-10	7.58e-09	6.02e-09
REACTOME_SYNTHESIS_OF_DNA	110	2.90066	1e-10	7.58e-09	6.02e-09
REACTOME_MITOTIC_METAPHASE_AND_ANAPHASE	201	2.88716	1e-10	7.58e-09	6.02e-09
WP_RETINOBLASTOMA_GENE_IN_CANCER	84	2.81435	1e-10	7.58e-09	6.02e-09
REACTOME_S_PHASE	145	2.79876	1e-10	7.58e-09	6.02e-09
REACTOME_MITOTIC_SPINDLE_CHECKPOINT	92	2.77242	1e-10	7.58e-09	6.02e-09
REACTOME_PRE_NOTCH_EXPRESSION_AND_PROCESSING	106	2.1037	0.000212	0.00666	0.005539
REACTOME_SIGNALING_BY_NOTCH	233	1.62501	0.000202	0.00666	0.005539
REACTOME_TCF_DEPENDENT_SIGNALING_IN_RESPONSE_TO_WNT	231	1.53408	0.000203	0.00666	0.005539
WP_4249_HEDGEHOG_SIGNALING_PATHWAY	43	-1.94397	0.001339	0.020584	0.017119
