# Supplementary material for: Genes associate with Immunity and Amino Acid Metabolism in Lung adenocarcinoma (LUAD): A bioinformatic analysis
Source: Research Square preprint supplement (doi:10.21203/rs.3.rs-3344958/v1), 2023-09-28
Supplement: Supplementary file 10 [file 8ffe90c9be6d634528205ab9.xlsx]

## Sheet: Sheet1
ID	logFC	AveExpr	t	P.Value	qvalue
HALLMARK_E2F_TARGETS	0.645333	0.00065017	5.65274	5.72e-08	6.02e-09
HALLMARK_G2M_CHECKPOINT	0.570976	0.00140977	5.54155	9.92e-08	6.02e-09
HALLMARK_BILE_ACID_METABOLISM	-0.384015	-0.0001741	-5.25777	3.91e-07	6.02e-09
HALLMARK_MYC_TARGETS_V1	0.530643	0.00233643	4.8002	3.2e-06	6.02e-09
HALLMARK_DNA_REPAIR	0.373068	-0.0170058	4.60038	7.7e-06	6.02e-09
HALLMARK_MYC_TARGETS_V2	0.534443	-0.0029183	4.34714	2.25e-05	6.02e-09
HALLMARK_KRAS_SIGNALING_DN	-0.323805	-0.0046782	-4.21351	3.88e-05	6.02e-09
HALLMARK_MITOTIC_SPINDLE	0.302157	-0.0128773	3.90775	0.00012953	6.02e-09
HALLMARK_MTORC1_SIGNALING	0.336719	-0.007894	3.89486	0.00013607	6.02e-09
HALLMARK_UNFOLDED_PROTEIN_RESPONSE	0.314953	0.00276347	3.88889	0.00013921	6.02e-09
HALLMARK_INTERFERON_ALPHA_RESPONSE	0.397711	0.00346612	3.4008	0.00081919	0.005539
HALLMARK_FATTY_ACID_METABOLISM	-0.267686	0.00117008	-3.36118	0.00093845	0.005539
HALLMARK_ESTROGEN_RESPONSE_EARLY	-0.249755	-0.0005093	-3.33745	0.00101747	0.005539
HALLMARK_UV_RESPONSE_UP	0.230545	-0.0038078	3.279	0.00123929	0.017119
HALLMARK_XENOBIOTIC_METABOLISM	-0.229601	0.0141919	-3.2284	0.00146686
HALLMARK_UV_RESPONSE_DN	-0.259128	0.00401489	-3.22032	0.00150662
HALLMARK_SPERMATOGENESIS	0.233845	0.00096414	3.13244	0.00200847
HALLMARK_ANDROGEN_RESPONSE	-0.235859	0.00089583	-3.13127	0.00201606
HALLMARK_PI3K_AKT_MTOR_SIGNALING	0.223369	-0.0058916	3.09358	0.00227632
HALLMARK_HEME_METABOLISM	-0.206367	-0.0026332	-3.08932	0.0023076
HALLMARK_MYOGENESIS	-0.261427	-0.0021476	-3.06118	0.0025245
HALLMARK_ADIPOGENESIS	-0.228189	-0.0074251	-3.03788	0.00271807
HALLMARK_NOTCH_SIGNALING	0.240042	-0.0155674	2.95404	0.00353347
HALLMARK_APOPTOSIS	0.207675	0.00230802	2.81082	0.00546024
HALLMARK_INTERFERON_GAMMA_RESPONSE	0.287718	0.00750707	2.77042	0.00615517
HALLMARK_PEROXISOME	-0.195348	-0.0063351	-2.63629	0.00907583
HALLMARK_TGF_BETA_SIGNALING	0.216035	0.00212297	2.45542	0.0149724
HALLMARK_GLYCOLYSIS	0.183464	-0.003386	2.45447	0.0150111
HALLMARK_ESTROGEN_RESPONSE_LATE	-0.174441	0.0007029	-2.35924	0.0193287
HALLMARK_WNT_BETA_CATENIN_SIGNALING	0.194364	-0.0015724	2.19546	0.0293438
HALLMARK_ALLOGRAFT_REJECTION	0.214718	0.00492428	2.10028	0.037026
