# Supplementary material for: Genes associate with Immunity and Amino Acid Metabolism in Lung adenocarcinoma (LUAD): A bioinformatic analysis
Source: Research Square preprint supplement (doi:10.21203/rs.3.rs-3344958/v1), 2023-09-28
Supplement: Supplementary file 11 [file 92204b652e94f69353624e4a.xlsx]

## Sheet: Sheet1
Characteristics	overall
Pathologic T stage, n (%)
T1	176 (32.8%)
T2	292 (54.5%)
T3	49 (9.1%)
T4	19 (3.5%)
Pathologic N stage, n (%)
N0	350 (66.9%)
N1	97 (18.5%)
N2	74 (14.1%)
N3	2 (0.4%)
Pathologic M stage, n (%)
M0	365 (93.6%)
M1	25 (6.4%)
Pathologic stage, n (%)
Stage I	296 (55.7%)
Stage II	125 (23.5%)
Stage III	84 (15.8%)
Stage IV	26 (4.9%)
Gender, n (%)
Female	289 (53.6%)
Male	250 (46.4%)
Age, n (%)
<= 65	257 (49.4%)
> 65	263 (50.6%)
OS event, n (%)
Alive	347 (64.4%)
Dead	192 (35.6%)
OS event, n (%)
Yes	226 (41.9%)
No	313 (58.1%)
