# Supplementary material for: Genes associate with Immunity and Amino Acid Metabolism in Lung adenocarcinoma (LUAD): A bioinformatic analysis
Source: Research Square preprint supplement (doi:10.21203/rs.3.rs-3344958/v1), 2023-09-28
Supplement: Supplementary file 12 [file 9d005a5f4dc4b09abe194f12.xlsx]

## Sheet: Sheet1
Rank	Name	Score
1	E2F8	1.08551
1	E2F7	1.08551
3	HMMR	1.08106
4	CDCA7	1.07691
5	BIRC5	1.05481
6	TRIP13	1.04973
7	UBE2C	1.03602
8	ANLN	1.03575
9	CCNB2	1.03002
10	TROAP	1.02841
11	CDT1	1.01036
12	RRM2	1.00643
13	CCNE1	1.00046
14	CDC25C	0.995979
15	CENPF	0.96236
16	CDC20	0.954952
17	KIF23	0.912081
18	PKMYT1	0.910024
19	MAD2L1	0.896355
20	BLM	0.894117
21	E2F2	0.881344
22	AURKA	0.871836
23	PLK1	0.869247
24	CCNA2	0.844587
25	CDK1	0.836695
26	KIF11	0.782938
27	RECQL4	0.758089
28	CIT	0.713237
28	GALNT12	0.713237
30	MUC4	0.658576
