# Supplementary material for: Genes associate with Immunity and Amino Acid Metabolism in Lung adenocarcinoma (LUAD): A bioinformatic analysis
Source: Research Square preprint supplement (doi:10.21203/rs.3.rs-3344958/v1), 2023-09-28
Supplement: Supplementary file 13 [file b95b1638324f37ca7f7100f3.xlsx]

## Sheet: Sheet1
Gene Symbol
ZIC2	CXCR1	KIF1A	SIGLEC11	CHRNB4	HOXC11	PROM2	TAL1
ABCA3	CYP27B1	KIF23	SIM2	CHRNG	HOXC13	PSAT1	TESC
ACADL	CYP2F1	KIF5A	SIX6	CILP	HOXC9	PTGES	TFAP2A
ACVRL1	CYP4B1	KIRREL2	SLC13A5	CIT	HOXD13	PTPRZ1	TFF1
ADAM8	CYP4F3	KLF4	SLC1A1	CLEC14A	HPDL	PYCR1	TFF2
ADAMTS8	DAO	KLHDC8A	SLC1A7	CLPS	HRH3	RAB26	TH
ADCYAP1R1	DCAF4L2	KLK12	SLC22A11	CMTM2	HTR3A	RAMP2	THBD
ADH1B	DEFA4	KLK3	SLC25A10	COCH	IGF2BP3	RAMP3	TLX1
ADRB2	DKK4	KLK6	SLC28A1	COL10A1	IGFBP1	RECQL4	TLX2
AFP	DLC1	KLK8	SLC28A2	COL1A1	IGFBP3	REG4	TMEM171
AGT	DLX5	KRT14	SLC2A1	COL5A1	IGLON5	RETN	TMEM179
AHNAK2	DPEP1	KRT15	SLC2A2	COL5A2	IL1RL1	RNF186	TMEM59L
AIM2	E2F2	KRT17	SLC2A5	COL9A1	IL31RA	RRM2	TMEM63C
AK4	E2F7	KRT3	SLC30A10	COX4I2	IL6	RUFY4	TMEM74
AKR1C1	E2F8	KRT34	SLC30A2	CP	ITPKA	SCARA5	TMEM88
AKR1C2	EDNRB	KRT4	SLC39A5	CPS1	IVL	SCN8A	TNNC1
AKR1C3	EEF1A2	KRT79	SLC4A1	CPT1B	KCNA10	SCUBE1	TNNI3
AKR1D1	EFNA2	KRT83	SLC6A15	CPXM1	KCNA5	SEMA5A	TNNT1
ALB	EMX1	LAMP3	SLC6A17	CRABP1	KCNE4	SERPINA5	TPPP3
ALDH3B2	EN2	LCN2	SLC6A18	CTAG2	KCNK9	SERPINA9	TRIM72
ALOX15	EPHA8	LILRA5	SLC6A3	CXCL13	KCTD4	SFTPC	TRIP13
ANGPTL7	F2	LIPN	SLC7A11	CXCL14	KIF11	SFTPD	TROAP
ANKRD22	F5	LPO	SLC7A5	BIRC5	GAD1	MUC2	TSPAN8
ANKRD33	F7	LRRC15	SLC7A9	BLM	GALR3	MUC4	TTR
ANKRD34B	FABP4	LRRC2	SLC9A3	C11orf91	GAST	MUC5AC	TUBB1
ANLN	FABP7	MAD2L1	SNX22	C1QL1	GCG	MUC5B	ZBTB16
AOC3	FAM180B	MAG	SOX21	CA10	GCGR	MUC6	ZG16B
APOBEC3B	FBXO32	MAGEA6	SPN	CA4	GCLC	MYBPH
ARHGEF15	FGFR4	MARCO	SPRR1B	CA9	GDF2	MYCN
ARNTL2	FGR	MB	SST	CACNA1I	GFAP	NDRG4
ARTN	FHL1	MC5R	SSTR1	CACNA2D2	GH2	NGB
ASPA	FOSB	MELTF	STRA6	CALML3	GIMAP6	NKX2-2
ATP4A	FOXD1	MKRN3	STX11	CALML5	GJB4	NKX2-5
AURKA	FPR2	MMP1	STYK1	CALML6	GLDC	NKX3-2
B3GNT6	FRMD3	MMP11	SUSD2	CARD14	GNGT1	NKX6-1
BARHL2	FTCD	MMP13	SYNGR3	CAV1	GPA33	NLRC4
BCL2L10	FUT6	MNX1	SYNGR4	CAV3	GPD1	NMUR1
BDNF	FXYD1	MSI1	SYT2	CBX2	GPR35	NPTX1
BHMT	FZD9	MSR1	SYT5	CCDC54	GPT	OTC
BHMT2	G6PC2	MUC16	SYT7	CCL24	GPT2	OVOL1
CD93	HAL	PDK4	TUBB3	CCNA2	GPX3	PADI4
CDA	HAO1	PEBP4	TUBB4A	CCNB2	GREB1	PAH
CDC20	HBB	PGLYRP3	UBE2C	CCNE1	GREM1	PANX2
CDC25C	HBEGF	PHOX2A	UNC93A	CD300LG	GRIN1	PAX7
CDCA7	HECW1	PIP5K1B	VGF	CD36	GRK5	PCDH8
CDH3	HGD	PKHD1L1	VSIG4	CD52	GSTM5	PCK1
CDK1	HGFAC	PKMYT1	VWF	CD79A	H2AC18	PCSK1
CDKN2A	HMGA1	PLA2G4A	WNK2	CDT1	HMMR	PNMA5
CDO1	HMGB3	PLK1	XDH	CEACAM8	HNF1A	PRAM1
CGA	HOXA11	PRKG2	ZIC4	CENPF	HNF4A	PRKCG
